# Supplementary material for: Clinical manifestations and healthcare utilization before diagnosis of transthyretin amyloidosis
Source: Atypon-hosted journal article supplement (doi:10.2217/cer-2022-0074), 2022-08-22
Supplement: supplemental material.docx [file supplemental%20material.docx]

**Supplemental Material**

| **Supplemental Table I.** **Diagnostic Testing and Therapeutic Procedures During Three Years Prior to Diagnosis** | | | |
| --- | --- | --- | --- |
|  | **ATTR Amyloidosis** | **Matched DF Controls*** | ***P* Value** |
| **N** | 552 | 552 |  |
| **Diagnostic testing** |  |  |  |
| **Blood or urine testing, n (%)** | **253 (45.8)** | **101 (18.3)** | **<0.001** |
| First evidence occurred |  |  | <0.001 |
| No evidence | 299 (54.2) | 451 (81.7) |  |
| Pre Y3 | 64 (11.6) | 32 (5.8) |  |
| Pre Y2 | 58 (10.5) | 38 (6.9) |  |
| Pre Y1 | 131 (23.7) | 31 (5.6) |  |
| **Cardiac imaging, n (%)** | **451 (81.7)** | **266 (48.2)** | **<0.001** |
| First evidence occurred |  |  | <0.001 |
| No evidence | 101 (18.3) | 286 (51.8) |  |
| Pre Y3 | 203 (36.8) | 131 (23.7) |  |
| Pre Y2 | 108 (19.6) | 85 (15.4) |  |
| Pre Y1 | 140 (25.4) | 50 (9.1) |  |
| Pyrophosphate imaging | 30 (5.4) | --b | <0.001 |
| Cardiac MRI | 77 (13.9) | --b | <0.001 |
| Echocardiogram | 450 (81.5) | 266 (48.2) | <0.001 |
| **Tissue biopsy and genetic testing, n (%)** | **183 (33.2)** | **158 (28.6)** | **0.103** |
| First evidence occurred |  |  | 0.023 |
| No evidence | 369 (66.8) | 394 (71.4) |  |
| Pre Y3 | 81 (14.7) | 77 (13.9) |  |
| Pre Y2 | 44 (8.0) | 50 (9.1) |  |
| Pre Y1 | 58 (10.5) | 31 (5.6) |  |
| **Other testing, n (%)** | **127 (23.0)** | **62 (11.2)** | **<0.001** |
| First evidence occurred |  |  | <0.001 |
| No evidence | 425 (77.0) | 490 (88.8) |  |
| Pre Y3 | 46 (8.3) | 29 (5.3) |  |
| Pre Y2 | 28 (5.1) | 15 (2.7) |  |
| Pre Y1 | 53 (9.6) | 18 (3.3) |  |
| Nerve conduction (NCS) | 106 (19.2) | 47 (8.5) | <0.001 |
| Autonomic nervous system function | 13 (2.4) | --† | 0.176 |
| Gastric emptying study | --† | --† | 0.246 |
| Mass spectrometry | 24 (4.3) | 12 (2.2) | 0.042 |
| **Therapeutic procedures and durable medical equipment** | | | |
| **Defibrillator/pacemaker (cardiac implantable electronic device), n (%)** | **90 (16.3)** | **40 (7.2)** | **<0.001** |
| First evidence occurred |  |  | <0.001 |
| No evidence | 462 (83.7) | 512 (92.8) |  |
| Pre Y3 | 49 (8.9) | 33 (6.0) |  |
| Pre Y2 | 14 (2.5) | --† |  |
| Pre Y1 | 27 (4.9) | --† |  |
| **Stent, n (%)** | **40 (7.2)** | **13 (2.4)** | **<0.001** |
| First evidence occurred |  |  | 0.001 |
| No evidence | 512 (92.8) | 539 (97.6) |  |
| Pre Y3 | 11 (2.0) | --† |  |
| Pre Y2 | 16 (2.9) | --† |  |
| Pre Y1 | 13 (2.4) | --† |  |
| **Cardiac ablation, n (%)** | **28 (5.1)** | **--**† | **<0.001** |
| First evidence occurred |  |  | 0.008 |
| No evidence | 524 (94.9) | 544 (98.6) |  |
| Pre Y3 | --† | --† |  |
| Pre Y2 | 11 (2.0) | --† |  |
| Pre Y1 | --† | --† |  |
| **Cardioversion, n (%)** | **69 (12.5)** | **13 (2.4)** | **<0.001** |
| First evidence occurred |  |  | <0.001 |
| No evidence | 483 (87.5) | 539 (97.6) |  |
| Pre Y3 | 19 (3.4) | --† |  |
| Pre Y2 | 25 (4.5) | --† |  |
| Pre Y1 | 25 (4.5) | --† |  |

Abbreviations: ATTR, Transthyretin mediated amyloidosis; DF, disease free; MRI, magnetic resonance imaging.

* Matched with age, gender, and region.

† Reported per CMS cell size suppression policy (i.e., frequency <11).

| **Supplemental Table II. Healthcare Utilization During Three Years Prior to Diagnosis** | | | |
| --- | --- | --- | --- |
|  | **ATTR Amyloidosis** | **Matched DF Controls*** | ***P* Value** |
| **N** | 552 | 552 |  |
| **Any inpatient hospitalization in past 3 years, n (%)** | 298 (54.0) | 196 (35.5) | <0.001 |
| **Any CV-related inpatient** †**hospitalization in past 3 years, n (%)** | 164 (29.7) | 63 (11.4) | <0.001 |
| **Any ED visit in past 3 years, n (%)** | 309 (56.0) | 240 (43.5) | <0.001 |
| **Any CV-related ED visit** † **in past 3 years, n (%)** | 126 (22.8) | 72 (13.0) | <0.001 |
| **No. of physician office visits in past 3 years, Mean (SD)** | 56.8 (39.9) | 41.3 (33.6) | <0.001 |
| **No. of prescription filled in past 3 years, Mean (SD)** | 100.0 (62.8) | 87.4 (73.9) | 0.002 |

Abbreviations: ATTR, Transthyretin mediated amyloidosis; CV, cardiovascular; DF, disease free; dx, diagnosis; SD, standard deviation.

* Matched with age, gender, and region.

† CV-related hospitalization (or ED visit) defined as an inpatient (or ED visit) claim with a primary diagnosis code for one of the selected CV conditions.
